# Supplementary material for: Bilayer graphene/HgCdTe based very long infrared photodetector with superior external quantum efficiency, responsivity, and detectivity
Source: Royal Society of Chemistry journal article supplement (doi:10.1039/c8ra07683a), 2018-01-01
Supplement: c8ra07683a1.pdf [file c8ra07683a1.pdf]

Electronic Supplementary Information for

## Bilayer Graphene/HgCdTe Based Very Long Infrared Photodetector with Superior External Quantum Efficiency, Responsivity, and Detectivity

Shonak Bansal,<sup>a</sup> Kuldeep Sharma,<sup>a</sup> Prince Jain,<sup>a</sup> Neha Sardana,<sup>b</sup> Sanjeev Kumar,<sup>c</sup> Neena Gupta<sup>a</sup> and Arun K. Singh<sup>a\*</sup>

<sup>a</sup>Department of Electronics and Communication Engineering, Punjab Engineering College (Deemed to be University), Sector-12, Chandigarh-160012, India

<sup>b</sup>Department of Metallurgical and Materials Engineering, Indian Institute of Technology, Ropar, India

<sup>c</sup>Department of Applied Sciences, Punjab Engineering College (Deemed to be University), Sector-12, Chandigarh-160012, India.

\*E-mail: arun@pec.ac.in

### Hole and electron effective masses

According to Kane band and Weiler model, the effective mass of hole ( $m_p^*$ ) and electron ( $m_n^*$ ) can be estimated by Eqns. S1 and S2, respectively<sup>1,2</sup>:

$$m_p^* = 0.55 * m_0 \quad (S1)$$

$$m_n^* = \frac{m_0}{\left[ -0.6 + 6.333 \left( \frac{2}{E_{gn}(x,T)} + \frac{1}{E_{gn}(x,T) + 1} \right) \right]} \quad (S2)$$

where  $m_0$  is the rest mass of electron.

### Spectral response

Fig. S1a shows the spectral response of proposed photodetector which is a variation of the source photocurrent ( $I_S$ ), available photocurrent ( $I_A$ ) and cathode photocurrent ( $I_{light}$ ). Here,  $I_S$  and  $I_A$  represent the rate of incident and absorbed photons, respectively, in the device. Typically,  $I_A$  is smaller than that of  $I_S$  due to reflection and transmission of illumination from the device. The results demonstrate rapid fall in available photocurrent and cathode current beyond cut-off wavelength, i.e., 20.6  $\mu\text{m}$  for the proposed VLWIR photodetector. The internal quantum efficiency ( $QE_{int}$ ) and external quantum efficiency ( $QE_{ext}$ ) are estimated from the following eqns. S3 and S4<sup>3,4</sup>

$$QE_{int}(\%) = \left( \frac{I_A}{I_S} \right) \times 100 \quad (S3)$$

$$QE_{ext}(\%) = \left( \frac{I_{light}}{I_S} \right) \times 100 \quad (S4)$$

The variation of internal quantum efficiency ( $QE_{int}$ ) and internal photocurrent responsivity ( $R_i^{int}$ ) as a function of wavelength at 77 K with a bias of -0.5 V is shown in Fig. S1b.

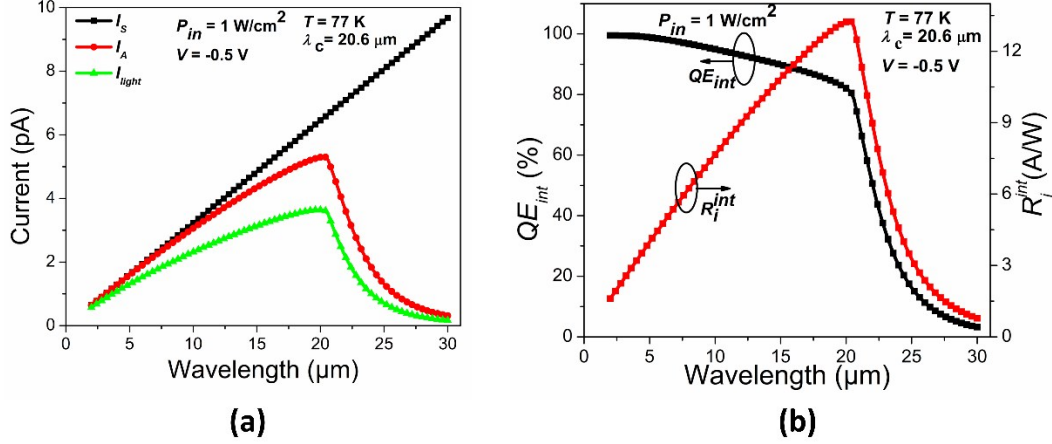

Fig. S1. (a) The spectral response of the photodetector with  $P_{in} = 1 \text{ W/cm}^2$  and  $V = -0.5 \text{ V}$  at 77 K.  $I_s$ ,  $I_A$ , and  $I_{light}$  corresponds to source photocurrent, available photocurrent, and cathode photocurrent, respectively. (b) The internal quantum efficiency ( $QE_{int}$ ), and internal photocurrent responsivity ( $R_i^{int}$ ) as a function of wavelength with  $P_{in} = 1 \text{ W/cm}^2$ ,  $V = -0.5 \text{ V}$  at 77 K. The cut-off wavelength of proposed VLWIR is 20.6 μm. The device exhibits the maximum  $QE_{int}$  and maximum  $R_i^{int}$  of 99.49% and 13.26 A/W, respectively.

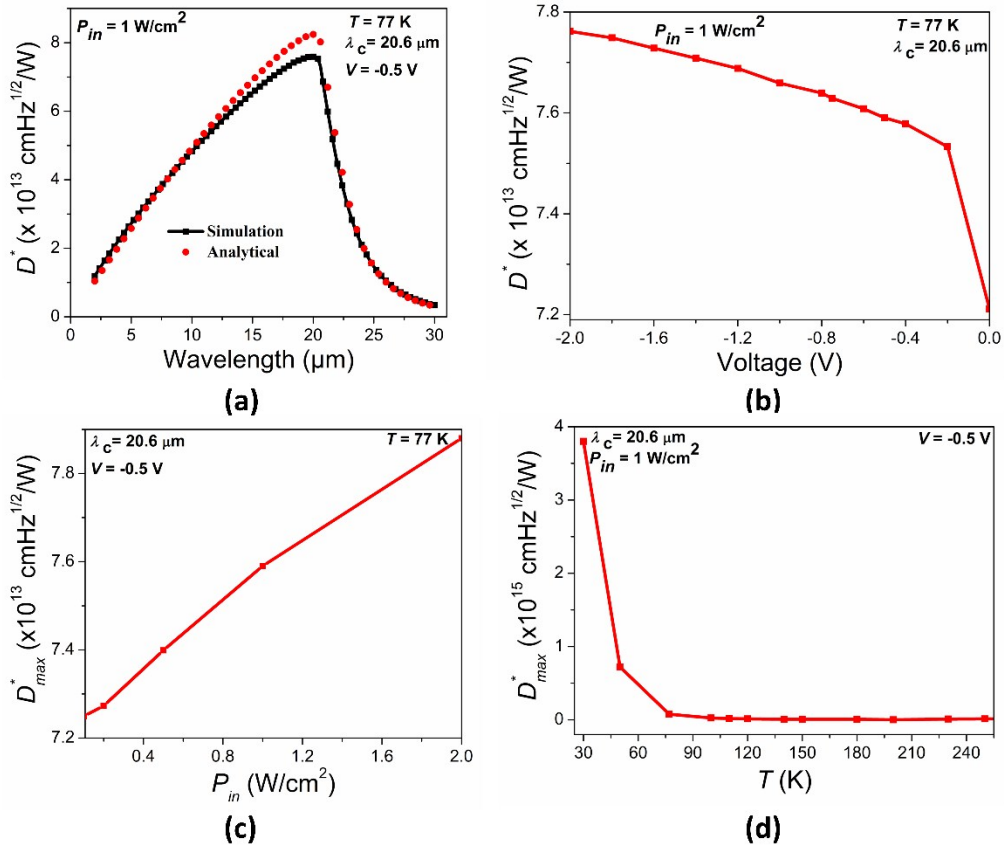

Fig. S2. (a) The specific detectivity ( $D^*$ ) as a function of wavelength with incident power of 1 W/cm<sup>2</sup> at 20.6 μm at  $V = -0.5 \text{ V}$  and  $T = 77 \text{ K}$ . The results are well in accordance with the results obtained from analytical model. The maximum  $D^*$  of photodetector is  $\sim 7.6 \times 10^{13} \text{ cmHz}^{1/2}/\text{W}$  at 20.6 μm wavelength. (b) The  $D^*_{max}$  value as a function of applied reverse bias voltage under 20.6 μm IR radiation with an incident power of 1 W/cm<sup>2</sup> at 77 K. The increase in reverse bias voltage increases the  $D^*_{max}$ . (c) The  $D^*_{max}$  at  $V = -0.5 \text{ V}$  and  $T = 77 \text{ K}$  of the photodetector as a function of  $P_{in}$ . The  $D^*_{max}$  value increases linearly with  $P_{in}$ . (d) The  $D^*_{max}$  value of the photodetector under different temperatures at  $V = -0.5 \text{ V}$  and  $P_{in} = 1 \text{ W/cm}^2$ . The  $D^*_{max}$  value decreases with temperature.

## Specific detectivity ( $D^*$ )

The Fig. S2a shows the simulated and analytical results of  $D^*$  as a function of wavelength for the proposed BLG/HgCdTe photodetector at  $-0.5$  V bias with an illumination of  $20.6 \mu\text{m}$  at  $1 \text{ W/cm}^2$  and  $77 \text{ K}$ , whereas, Figs. S2b, S2c and S2d show the maximum  $D^*$  ( $D^*_{max}$ ) with respect to applied reverse bias, different incident power  $P_{in}$  and temperature, respectively.

## Effect of temperature on external quantum efficiency ( $QE_{ext}$ )

The  $QE_{ext}$  increases with the increase in temperature at a bias of  $-0.5$  V as given in Fig. S3†. However, it demonstrates a different behaviour at low temperatures i.e.  $30\text{--}120 \text{ K}$  (in the inset of Fig. S3†), and at high temperatures varying from  $140$  to  $250 \text{ K}$ . Interestingly,  $QE_{ext}$  exceeds more than  $100\%$  for temperatures starting from  $120 \text{ K}$  due to the generation of long lifetime of photo-induced hot carriers (electron–holes) in VLWIR region. The increase in recombination of charge carriers at higher wavelength reduces the flow of photocurrent and hence decreases  $QE_{ext}$  as shown in Fig. S3†.

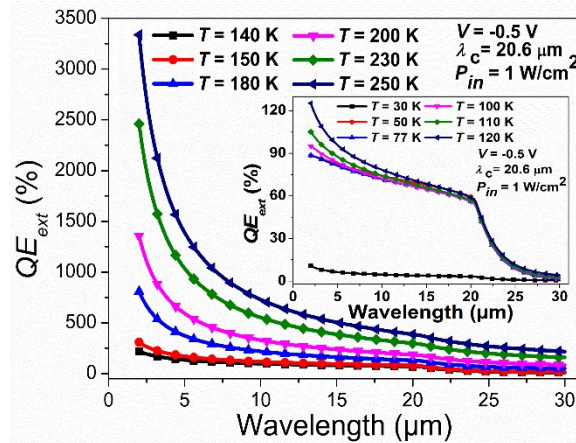

Fig. S3. The  $QE_{ext}$  as a function of wavelength with an incident power of  $1 \text{ W/cm}^2$  at  $20.6 \mu\text{m}$  for  $-0.5$  V bias at different temperatures varying from  $30$  to  $250 \text{ K}$ . The  $QE_{ext}$  exceeds  $100\%$  for different temperatures from  $120$  to  $250 \text{ K}$  due to the generation of long lifetime of photo-induced hot carriers in VLWIR region.

## References

- 1 A. Rogalski, *Reports on Progress in Physics*, 2005, **68**, 2267–2336.
- 2 M. H. Weiler, *Semiconductors and Semimetals*, 2008, **16**, 119–191.
- 3 T. Varma, S. Sharma, C. Periasamy and D. Boolchandani, *Journal of Nanoelectronics and Optoelectronics*, 2015, **10**, 1–5.
- 4 S. Sharma, A. Sumathi and C. Periasamy, *IETE Technical Review*, 2016, **34**, 83–90.
